# Supplementary material for: Snapper: high-sensitive detection of methylation motifs based on Oxford Nanopore reads
Source: PubMed Central journal article supplement (PMC10689673; doi:10.1093/bioinformatics/btad702), 2023-11-20
Supplement: btad702_supplementary_data.pdf [file btad702_supplementary_data.pdf]

## 1. Supplementary methods

As we have only one promoter region  $P_{Cm}$  from *catGC* cassette, successfully expressing in *H. pylori* cells, we used this promoter in both cases: as a part of chloramphenicol resistant amplicon and fused with promoterless kanamycin resistance gene for kanamycin amplicon. The *catGC* cassette and chloramphenicol resistance gene promoter region  $P_{Cm}$  were amplified from the plasmid pHel2 [1] using ACm-F/ACm-R and ACmp-F/ACmp-R primer set, respectively. Promoterless kanamycin resistance gene were amplified from the plasmid pEGFP-N1 (<https://www.addgene.org/vector-database/2491/>) using AKan-F/AKan-R primer set (Supplementary Table 7). All inner primers were constructed in an overlapping manner for latter two-step PCR amplification of full-length amplicons. (Supplementary Figure 5).

Two-step PCR amplification was realized as follows. On the first step two *H. pylori* flanking fragments and resistance gene fragment in equal concentrations 10 ng were incubated without primers in a final volume of 45  $\mu$ L containing 1x Tersus plus buffer, 100  $\mu$ mmol/L deoxynucleoside triphosphate, 0.4 U of Tersus polymerase (Evrogen, Russia) in thermocycler T100 (BioRad, USA) for 8-10 cycles for overlapping fragment parts could «stick» to each other. At the second stage, the appropriate primers, 20  $\mu$ mmol/L of each primer, were added and mixtures were amplified for 25 cycles (Supplementary Figure 6). In both cases two-step PCR amplification resulted in two full-length fragments 1671 bp for *hp0008* and 1567 bp for *hp0944* gene disruption, respectively.

The amplicon was purified using Cleanup Standard Kit (Evrogen, Russia), cloned into the pCR2.1 vector system using The Original TA Cloning Kit (Invitrogen, USA) according to the manufacturer's recommendations and transformed into *E. coli* Top10 strain. Cloning was verified by PCR with the M13F/R vector-based primer set (Supplementary Table 7). The plasmids pCR2.1-8, pCR2.1-9 containing the expected amplicon (Supplementary Table 8) were purified using the QIAprep® Spin Miniprep Kit (Qiagen, Germany) and sequenced. Plasmids with verified amplicon nucleotide sequence were digested with restriction enzymes using XbaI/KpnI sites for *hp0008* gene disruption amplicon and KpnI/NotI sites for *hp0944* gene disruption amplicon. Amplicons were purified from agarose gel in appropriate concentrations and used to transform *H. pylori* A45 cells as described earlier.

**Supplementary Table 1.** Plasmids and strains used in this study.

| Plasmid/Strain       | Description                                                                                                                   | References |
|----------------------|-------------------------------------------------------------------------------------------------------------------------------|------------|
| PLASMIDS             |                                                                                                                               |            |
| pGEM-HpyIM- $\kappa$ | pGEM-T-Easy vector system containing full-length amplicon for <i>HpyAI</i> gene disruption in <i>H. pylori</i> A45 strain     | [2]        |
| pGEM-HpyIIIM         | pSK-Kn vector system containing full-length amplicon for <i>hp0091/hp0092</i> genes disruption in <i>H. pylori</i> A45 strain | [2]        |

|                          |                                                                                                                            |            |
|--------------------------|----------------------------------------------------------------------------------------------------------------------------|------------|
| pSK-HpyIVM               | pGEM-T-Easy vector system containing full-length amplicon for <i>hp1352</i> gene disruption in <i>H. pylori</i> A45 strain | [2]        |
| pCR2.1-8                 | pCR2.1 vector system containing full-length amplicon for <i>hp0008</i> gene disruption in <i>H. pylori</i> A45 strain.     | This study |
| pCR2.1-9                 | pCR2.1 vector system containing full-length amplicon for <i>hp0944</i> gene disruption in <i>H. pylori</i> A45 strain.     | This study |
| <i>H. PYLORI</i> STRAINS |                                                                                                                            |            |
| A45                      | WT                                                                                                                         | [2]        |
| <i>hpy</i>               | A45 mutant strain with disrupted in the HpyAI gene by homologous recombination                                             | [2]        |
| <i>hp91/92</i>           | A45 mutant strain with disrupted in the <i>hp0091/hp0092</i> genes by homologous recombination                             | [2]        |
| <i>hp1352</i>            | A45 mutant strain with disrupted in the <i>hp1352</i> gene by homologous recombination                                     | [2]        |
| A458 ( <i>hp8</i> )      | A45 mutant strain with disrupted in the <i>hp0008</i> gene by homologous recombination                                     | This study |
| A459 ( <i>hp944</i> )    | A45 mutant strain with disrupted in the <i>hp0944</i> gene by homologous recombination                                     | This study |

**Supplementary Table 2.** Oligonucleotides used in this study.

| Primer set           | Sequence                                                            | Product                                |
|----------------------|---------------------------------------------------------------------|----------------------------------------|
| Hs9441-F<br>Hs9441-R | AATCCACACCCTTTGGATAACT<br>GGGGCGTAACTAATGGAGCGTGGATTAGCA            | hp0944 upper region<br>353 bp          |
| ACm-F<br>ACm-R       | ACGCTCCATTAGTTACGCCCCGCCCTGCCA<br>GTGAGCTTAAACCGCCATATTGTGTTGAAACAC | chloramphenicol<br>resistance cassette |
| Hs9442-F<br>Hs9442-R | ACAATATGGCGGTTTAAGCTCACTTGTCCGTC<br>GGGAGATAGAAGCATAGAAGTT          | hp0944 lower region<br>456 bp          |

|                  |                                                                 |                                                                                         |
|------------------|-----------------------------------------------------------------|-----------------------------------------------------------------------------------------|
| Hs82-F           | TCACGCCGTCTTGTTTGAGC                                            | hp0008 upper region                                                                     |
| Hs82-R           | TTTGAGAACTTAAACGAATCCACTAGCAAG                                  | 463 bp                                                                                  |
| AKan-F           | GTTTAAGTTCTCAAAATCAGAAGAAGCTCGT                                 | promoterless<br>kanamycin resistance<br>gene                                            |
| AKan-R           | AGCTAAAATGATTGAACAAGATGGATTGCA                                  |                                                                                         |
| ACmp-F<br>ACmp-R | TCAATCATTTTAGCTTCCTTAGCTCCTGAA<br>CTGGATACACGCCATATTGTGTTGAAACA | chloramphenicol<br>promoter region                                                      |
| Hs81-F           | CAATATGGCGTGTATCCAGCGTGAGCTTATC                                 | hp0008 lower region                                                                     |
| Hs81-R           | AGGCTTAGCGACTTTACACCA                                           | 325 bp                                                                                  |
| 23s-F            | GTAAGCCATAGAAAGTGATAGCCT                                        | primers for<br>verification<br>(complimentary to 23s<br>RNA H. pylori gene)             |
| 23s-R            | CTTAACCTTGCCAGATACCACA                                          |                                                                                         |
| Cms-F            | ATCCCATATCACCAGCTCAC                                            | primers for<br>verification<br>(complimentary to<br>chloramphenicol<br>resistance gene) |
| Cms-R            | GGAATTCCGTATGGCAATG                                             |                                                                                         |
| M13f             | TGTAAAACGACGGCCAGT                                              | primers for<br>verification<br>(complimentary to<br>pCR2.1 vector)                      |
| M13r             | CAGGAAACAGCTATGAC                                               |                                                                                         |

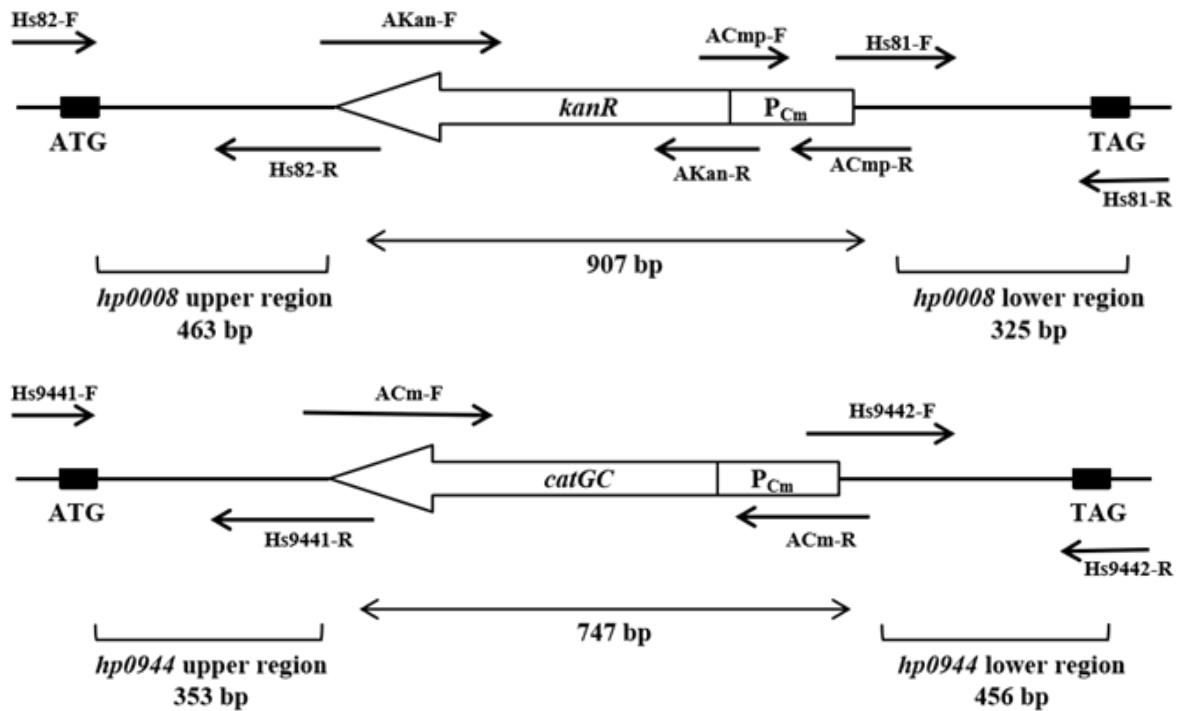

**Supplementary Figure 1.** Schematic map of the primer location and amplicons structure used for *hp0008* and *hp0944* gene disruption in *H. pylori* A45 strain.

| <i>1 step</i> | <i>2 step</i> |
|---------------|---------------|
| 95°C - 2:00   | 95°C - 2:00   |
| 95°C - 00:15  | 95°C - 00:20  |
| 60°C - 00:15  | 60°C - 00:20  |
| 72°C - 00:30  | 72°C - 2:00   |
| } 8-10 cycles | } 25 cycles   |
|               | 72°C - 00:15  |
|               | 4°C - ∞       |

**Supplementary Figure 2.** Two-step PCR conditions used for amplification of full-length fragments 1671 bp for *hp0008* and 1567 bp for *hp0944* gene disruption in *H. pylori* A45 strain, respectively.

## 2. *H. pylori* mutant strains construction. Plasmids used for gene inactivation restriction-modification systems

*H. pylori* mutant strains *hpy*, *hp91/92*, and *hp1352* were obtained earlier [11]. A cassette containing kanamycin resistance gene (*aphA-3*) as a selectable marker was inserted into the target region of the genome. For a detailed description of the plasmids used to inactivate the genes involved in restriction-modification systems, see Supplementary Materials Table 9 (3). Validation of the correct insertion of the cassette into the *H. pylori* genome was confirmed by PCR-analysis and sequencing of the obtained strains. Target inactivation - genes encoding methyltransferases was confirmed by restriction analysis of genomic DNA of the obtained strains using methyl-sensitive restriction

endonucleases: MboI (GATC), Hin1II (CATG), HinfI (GANTC). *H. pylori* mutant strains *hp8*, *hp944* were obtained during this work by homologous recombination. For construction *hp944* mutant strain (A45 strain disrupted in the *hp0944* gene) the amplicon, consisting of chloramphenicol resistance *catGC* cassette flanked by two fragments of the *hp0944* of 363 bp and 456 bp, was obtained by two-step PCR amplification. For construction *hp8* mutant strain (A45 strain disrupted in the *hp0008* gene) the amplicon, consisting of kanamycin resistance gene under chloramphenicol promoter region flanked by two fragments of the *hp0008* gene of 325 bp and 463 bp, was obtained by two-step PCR amplification. All *H. pylori* flanking regions were amplified from genomic DNA of A45 strain using Tersus polymerase kit (Evrogen, Russia) according to the directions of the manufacturers. All corresponding primer sets listed in Supplementary Table 7 (2). Schematic map of the primer location and amplicon structure used for *hp0008* and *hp0944* gene disruption in *H. pylori* A45 strain illustrated by Supplementary Figure 5 (1) in Supplementary Materials.

#### Plasmid Construction pGEM-HpyIM-κ (*hpy*)

Two fragments of the gene encoding HpyAI methyltransferase of *H. pylori* strain A45 labeled IM1 and IM2 were amplified using primers 1IMfw, 1IMrev, 2IMfvv, 2IMrev (Supplementary Table 9). For the full-length gene assembly, the following reaction mixture was composed: 200 ng of each IM1 and IM2 fragments, 20 pM of each primers 1IMfw and 2IMrev, 2mM dNTPs, 1xPCR buffer, 4u of Taq polymerase. PCR was performed with the following amplification conditions: 94°C – 30 sec, 45°C – 1 min, 72°C – 1 min. 30 sec. A total of 35 amplification cycles were performed. The resulting fragment, after being treated with XhoI restriction enzyme, was cloned into the pGEM-T-Easy plasmid (Promega, USA) which resulted in formation of the plasmid pGEM-HpyIM. The *aphA-3* kanamycin resistance gene was amplified from the pHel3 plasmid [1] using primers X-aph-fw and X-aph-rev, then the resulting fragment was digested with restriction enzyme XhoI and cloned into pGEM-HpyIM plasmid treated with XhoI restriction enzyme, which resulted in formation of the plasmid pGEM-HpyIM-κ.

#### Plasmid Construction pGEM-HpyIIIM (*hp91/92*)

Fragments of the *hp0091* and *hp0092* genes of the A45 *H. pylori* strain labeled 91 and 92 were amplified using primers 91fw, 91revKn, 92fw, 92revKn (Supplementary Table 9). The kanamycin resistance gene (*aphA-3*) was amplified from the pHel3 plasmid [1] using primers Knfw and Knrev. For cassette assembly the following reaction mix was used: 200 ng of fragments 91, 92 and *aphA-3*; 20 pM of each primers 91fw and 92rev, 2mM dNTPs, 1xPCR buffer, 4u of Taq polymerase. Amplification was performed by 35 cycles of PCR with following conditions: 94°C – 1 min, 45°C – 1 min, and 72°C – 4 min. Assembled cassette then was cloned into pGEM-T-Easy plasmid (Promega, USA) and the plasmid pGEM-HpyIIIM was formed.

#### Plasmid Construction pSK-HpyIVM (*hp1352*)

Fragments of the *hp1351* and *hp1352* genes of the A45 *H. pylori* strain labeled 1351 and 1352 were amplified using primers *gantcfw1*, *gantcrev1*, *gantcfw2*, *gantcrev2* (Supplementary Table 9). Fragment 1351 was digested by restriction endonucleases HindIII and XhoI, and then cloned into the pSK-Kn plasmid, resulting with the plasmid pSK-1351-Kn. Fragment 1352 was digested by restriction endonucleases PstI and XbaI, and then cloned into the pSK-1351-Kn plasmid, resulting in formation of the plasmid pSK-HpyIVM.

**Supplementary Table 3.** Oligonucleotides used to generate A45 mutant strains *hpy*, *hp91/92* and *hp1352*.

| <b>name</b> | <b>sequence 5'–3'</b>               |
|-------------|-------------------------------------|
| 1Imfw       | TACTCGAGTACTGCCCGCTAAAGCC           |
| 1IMrev      | CCTAAGCTTGCGAGGCAATACGGGGC          |
| 2IMfw       | CACTGCAGCCACGCACACCACACATCGC        |
| 2IMrev      | TTTCTAGAGGGTTCTACGGCTGTAGG          |
| X-aph-fw    | TCCTCGAGGATCTTTTAGACATCTAAAT        |
| X-aph-rev   | CGCTCGAGTCGATACTATGTTATACGCC        |
| 91fw        | GTCTTAAGACAAGCAATAGG                |
| 91revKn     | GATGTCTAAAAGATCCGCTCCAACCCCGTTTGACG |
| 92fwKn      | GATACAATATGCGGCAGCTGCCGTTATTTGACGC  |
| 92rev       | AGGATCGCCAATGAGAG                   |
| Knfw        | GATCTTTTAGACATCTAAAT                |
| Knrev       | TCGATACTATGTTATACGCC                |
| gantcfw1    | CTCTCGAGGACGCTAATTGCTGATAAATCG      |
| gantcrev1   | GAAGCTTTGCGAGACGACCATGACAGCGCC      |
| gantcfw2    | CTCTGCAGCCTTGCGCATCTTTTAGTCTTTTCG   |
| gantcrev2   | ATCTAGAGAAAACCTAAACACTATCATAG       |

### 3. Motif enrichment algorithm

The input data required by the algorithm are a list of  $k$ -mers (by default  $k = 15$ ) that are likely to bring a modified base in the FASTA format, a list of long  $k$ -mers (by default  $k = 29$ ), a reference genome in the FASTA format, signal shifts for each considered short  $k$ -mer and signal shifts for each long  $k$ -mer. The optional algorithm parameters are the desired confidence level threshold *conflevel* (default is 100 to provide higher sensitivity) and the maximum number of extracted motifs *max\_motifs* (default is 20).

- 1) The first stage is the generation of *motif\_variants*, the list of all potential motif variants. An individual motif variant is a vector with size of  $k$  looking as follows:

$$(b_1, b_2, b_3, \dots, b_{k-2}, b_{k-1}, b_k)$$

where the  $i$ -th element represents the nitrogenous base (A, G, T, or C) located in the  $i$ -th position of  $k$ -mer.

The maximum size of *motif\_variants* is limited by the total set of  $k$ -mers presented in the reference genome. Since on this step we mainly focus only on R-M systems of types II or III these motif variants should satisfy certain constraints that are common for all Type II-III R-M system recognition sites. These constraints are listed below:

1. A motif variant has strictly  $k$  letters.
2. A motif variant should contain at least 3 non-degenerate letters.
3. A motif variant should contain either A or C nucleotides (or both).
4. A motif variant should not contain individual non-degenerate nucleotides surrounded by two N.
5. A motif variant should not contain more than 8 letters other than N.
6. A motif variant should not contain more than two sequential N inside.

Constraints 2-6 were inferred using Golden Standard recognition site sequences available in REBASE.

Pattern examples (with  $k = 15$ ):

```
NGGGCTANNNNNNNN  
NNNNGCANNATNNNN  
NNNNNNNNNNCCWGG
```

- 2) Next, the algorithm generates the *reference\_set* list containing all  $k$ -mers presented in the reference genome. It will be used as a control set. The set of all  $k$ -mers that are most likely to bring a modified base will be named *seq\_set*.
- 3) Next, the algorithm performs the chi-square test for each motif presented in *seq\_set* in order to compare its frequency in *seq\_set* with the frequency in *reference\_set*. After all motifs in *seq\_set* are processed, the *motif\_variants* list is sorted according to the chi-square statistic value in descending order. The top motif is extracted and adjusted.
- 4) The adjustment process works as follows. All 'N' bases in the considered motif variant that are neighboring with canonical bases are iteratively changed to 'A', 'C', 'G', and 'T' and the frequency of resulting motifs is compared with the reference. If the A:C:G:T ratio in one

particular position in *seq\_set* is close to *reference\_set*, this base remains to be ‘N’. Otherwise, it changed to a more suitable letter (Y, W, S, H, etc). For the adjustment, the algorithm uses only non-filtered *seq\_set* regardless of iteration.

- 5) Next, the algorithm checks for the completeness of the extracted motif. It collects all *k*-mers that match the considered motif from the *reference\_seq*, merges signal levels for these motifs for native and control samples independently and compare them using K-S test. If the K-S test p-value is lower than the threshold, the algorithm considers the motif as incomplete. If the motif is incomplete, the algorithm checks if this motif is a part of a long motif.

To do that, the algorithm collects all long modified *k*-mers that contain this pattern, and performs a local motif enrichment with the logic similar to the main enrichment algorithms. The algorithm generates a list of all long motif variants, where each long motif variant should satisfy the heuristics generated using the Golden Standard REBASE dataset of long motifs (<http://rebase.neb.com/cgi-bin/trdlist?g>). For each long motif variant, the algorithm performs the chi-square test, returns 15 motifs with the highest chi-square statistics value and writes to the output file. If the considered short motif is actually a part of a long motif, these 15 long motif variants are quite similar, and the top variant describes the actual long motif sequence. Otherwise, the motif should be considered as short but not fully-methylated in the reference genome.

- 6) Next, the algorithm checks if the adjusted motif is a submotif for one of the extracted earlier motifs. If it is, the motif is transformed to its supermotif. For example, if we have already extracted the motif ‘NNNCATGNNNN’ with higher confidence level, and the current adjusted motif variant is ‘NNNNCATGWNN’, it will be transformed to ‘NNNNCATGNNN’.
- 7) Thereafter, the algorithm extracts the adjusted motif variant and performs filtering of the *seq\_set* by removing all *k*-mers that match this motif variant.
- 8) If the confidence level of the last extracted motif is less than *conflevel* or the number of extracted motifs equals *max\_motifs*, the algorithm stops. Otherwise, the algorithm goes to 3) and repeats processing of the filtered *seq\_set* to try to extract the next motif.

The algorithm output is the list of extracted motifs.

#### *Long methylation motifs detection example*

The main Snapper pipeline is designed to detect only short methylation motifs with a maximum length of 8 bases. However, we developed an additional module that performs local enrichment for motifs that seem incomplete (details are available in Supplementary Materials 3, step 5). As a result, this module proposes a list of longer motif variants and corresponding confidence levels. For example, in *N. gonorrhoeae* FA 1090, the main Snapper pipeline discovers a short GCA motif as methylated but not complete. The long motifs enrichment module supposes that GCA is a TRD1 recognition site sequence and searches for the most probable TRD2 sequence. In this particular case, the best statistics was obtained for GCANNNNNTGC which is an actual Type I R-M system recognition site in the considered *N. gonorrhoeae* strain. The algorithm saves the modified contexts containing the target motif so that a user could perform motif enrichment with MEME to additionally approve the motif sequence or use Nanodisco to define the methylation type.



In cases when TRD2 sequence with satisfactory confidence has not been found, the algorithm concludes that the motif is short but not fully-methylated.

#### 4. J99 extracted motifs

**Supplementary Table 4.** Snapper output for *H. pylori* J99

| MOTIF    | confllevel | effsize | comment                                                                           |
|----------|------------|---------|-----------------------------------------------------------------------------------|
| NCATGN   | 30725.1    | 1.304   |                                                                                   |
| NGCGCN   | 31789.6    | 0.85    |                                                                                   |
| NGATCN   | 28787.6    | 0.36    | extremely high confidence level                                                   |
| NGANTCN  | 18370.6    | 0.4     | high confidence level                                                             |
| NCCGGN   | 16504.4    | 0.98    |                                                                                   |
| NGCCTAN  | 18232.3    | 1.32    |                                                                                   |
| NGACAY   | 12090.2    | 1.12    | these two motifs combining with GTCAC (confllevel = 3847.4) form GWCA Y motif     |
| NGTCATN  | 12902.7    | 1.33    |                                                                                   |
| NACGTN   | 10060.5    | 1.07    |                                                                                   |
| NCCNNGG  | 8993.5     | 0.74    |                                                                                   |
| NGAGGN   | 8984.4     | 0.28    | high confidence level, moderate signal shift                                      |
| NATTAATN | 10201.5    | 0.95    |                                                                                   |
| NGGWCWAN | 10589.9    | 0.55    | These two motifs form GGWCNA motif                                                |
| NGGWCNAN | 9547.2     | 0.46    |                                                                                   |
| NGTACN   | 7495.2     | 1.07    |                                                                                   |
| NCGACGN  | 6267.5     | 1.02    | these two motifs form CGWCG motif                                                 |
| NCGTCGN  | 5088.5     | 0.51    |                                                                                   |
| NTCGAN   | 4788.8     | 0.44    | <p>Rather low signal shift and confidence level, should be verified manually.</p> |

|         |        |       |                                                                                                                               |
|---------|--------|-------|-------------------------------------------------------------------------------------------------------------------------------|
|         |        |       | Actually, the absence of a common mode indicates that it is an individual motif.                                              |
| NGTCACN | 3847.4 | 1.105 | combining with GTGAC (conflevel = 2307.4) forms GTSAC; combining with GACAY and GTCAT forms GWCA Y                            |
| NGTGACN | 2307.4 | 0.67  | combining with GTCAC (conflevel = 3847.4) forms GTSAC                                                                         |
| NAAGN   | 766.1  | 0.13  | was identified as incomplete, automatically extended to AAGNNNNNNCTC (conflevel=193756.5) AAGNNNNNNNTAAAG (conflevel=37314.7) |

confidence level legend:

red  $\leq 500$

500 < yellow  $\leq 3000$

3000 < green

effect size legend:

red  $\leq 0.25$

0.25 < yellow  $\leq 0.5$

0.5 < green

## 5. TCNNGA motif in J99 strain

Snapper did not extract the TCNNGA motif as methylated while PacBio did. To verify the results we manually observed all the modified context containing this motif. There were 1255 different 11-mers that had a significant signal shift and contained TCNNGA subsequence. Actually, TCNNGA is a quite highly-represented motif in the J99 genome that might cause a false-positive inference. We checked the presence of other motifs in each context and found that almost all of them (1190 contexts) were explained by the presence of one or more other confirmed methylation motifs (**Supplementary Listing 1**). Among the other 65 probably modified contexts more than half (38) contained homopolymeric fragments which as we found might often cause a false-positive signal shift. Generally, despite a quite high number of TCNNGA-containing contexts the number of unexplained contexts containing only TCNNGA but not any other methylation motifs is insufficient for TCNNGA inference. Thus, we can conclude that TCNNGA is not an individual methylation motif in our J99 strain.

**Supplementary Listing 1.** A shortened list of TCNNGA-containing contexts that are likely to bring a modified base. The second column shows the presence of a non-TCNNGA motif that explains the signal shift in each case. Only 25 out of 1255 contexts are shown just as an example. In total, 1190 TCNNGA-containing contexts that have a significant signal change are explained by other motifs.

| context          | actual motif |
|------------------|--------------|
| TCTCGATCCGC      | GATC         |
| GGAATCAAGAA      | GANTC        |
| TCAGTCACGAA      | GTSAC        |
| TTTTTCATGACCCATG |              |
| ATCATGACTGG      | CATG         |
| ATCATGAAATTCATG  |              |
| TAGAGTCCGGA      | CCGG         |
| GCGTGTCCGGA      | CCGG         |
| ATCTAGATCCT GATC |              |
| TCTTGATCTAT GATC |              |
| CACTCATGAGA      | CATG         |
| TCAAGATCAGA      | GATC         |
| TACGATCATGACATG  |              |
| AAAGATCTAGA      | GATC         |
| TATCAAGAATCGANTC |              |
| GCTTCATGATCCATG  |              |
| TGCTCATGAATCATG  |              |
| ACTCCAGAGGC      | GAGG         |
| TGCTCATGATACATG  |              |
| ATCTCCTGATCGATC  |              |
| TCAAGATCGCT      | GATC         |
| TCTTGATCTTGATC   |              |
| CACTCATGATCCATG  |              |
| GATCATGAAAT      | CATG         |
| GATCATGATTA CATG |              |



**Supplementary Table 5.** The comparison of Snapper, Nanodisco and Tombo on four external datasets.

| genome                                                                                                                                                          | Motifs detected with Nanodisco (manual mode) | Raw Snapper output     | Tombo output | source          | comment                                                                                                           |
|-----------------------------------------------------------------------------------------------------------------------------------------------------------------|----------------------------------------------|------------------------|--------------|-----------------|-------------------------------------------------------------------------------------------------------------------|
| <i>Thermacetogenium phaeum</i> DSM 12270<br><a href="https://www.ncbi.nlm.nih.gov/nucleotide/CP003732.1">https://www.ncbi.nlm.nih.gov/nucleotide/CP003732.1</a> | CGCG                                         | CGCG                   | CGCG         | REBASE & PacBio |                                                                                                                   |
|                                                                                                                                                                 | CCTCC                                        | CCTCC                  |              | REBASE & PacBio |                                                                                                                   |
|                                                                                                                                                                 | CAGAAA                                       | CAGAAA                 |              | REBASE & PacBio |                                                                                                                   |
|                                                                                                                                                                 | CCCrag                                       | CCCAAG, CCCGAG         |              | REBASE & PacBio |                                                                                                                   |
|                                                                                                                                                                 | CTACT                                        | CTACT                  |              | REBASE & PacBio |                                                                                                                   |
|                                                                                                                                                                 | GATC                                         | GATC                   | GATC         | REBASE & PacBio |                                                                                                                   |
|                                                                                                                                                                 | GGNCC                                        | GGNCC                  |              | REBASE & PacBio |                                                                                                                   |
|                                                                                                                                                                 | RAACTC                                       | RAACTC                 |              | REBASE & PacBio |                                                                                                                   |
|                                                                                                                                                                 | CCAG                                         | CCAG                   |              | this study      | these two motif were not mentioned in the reference work1 but were detected by us with both Nanodisco and Snapper |
| TGGCCA                                                                                                                                                          | TGGCCA                                       |                        | this study   |                 |                                                                                                                   |
| <i>Neisseria gonorrhoeae</i> FA 1090<br><a href="https://www.ncbi.nlm.nih.gov/nucleotide/NC_002946.2">https://www.ncbi.nlm.nih.gov/nucleotide/NC_002946.2</a>   | CCGCGG                                       | CCGCGG                 |              | REBASE & PacBio |                                                                                                                   |
|                                                                                                                                                                 | GCCGGC                                       | GCCGGC                 |              | REBASE & PacBio |                                                                                                                   |
|                                                                                                                                                                 | GCANNNNNNNTGC                                | GCANNNNNNNTGC          |              | REBASE & PacBio |                                                                                                                   |
|                                                                                                                                                                 | GGCC                                         | GGCC                   | GGCC         | REBASE & PacBio |                                                                                                                   |
|                                                                                                                                                                 | GGNNCC                                       | GGNNCC                 |              | REBASE & PacBio |                                                                                                                   |
|                                                                                                                                                                 | GGTGA                                        | GGTGA, TCACC           |              | REBASE & PacBio | complement sequences with non-symmetric modification site                                                         |
|                                                                                                                                                                 | GTANNNNNCTC                                  | GTANNNNNCTC            |              | REBASE & PacBio |                                                                                                                   |
|                                                                                                                                                                 | RGCICY                                       | AGCGCC, AGCGCT, GGCGCT |              | REBASE & PacBio | GGCGCC variant was omitted by Snapper since supermotif GGNNCC had been extracted earlier                          |
|                                                                                                                                                                 | CTNAG                                        | CTNAG                  |              | REBASE & PacBio |                                                                                                                   |
|                                                                                                                                                                 | AGCT                                         | AGCT                   |              | REBASE & PacBio |                                                                                                                   |

| genome                                                                                                                                                             | Motifs detected with Nanodisco (manual mode) | Raw Snapper output                   | Tombo output | source          | comment                                                                                                         |
|--------------------------------------------------------------------------------------------------------------------------------------------------------------------|----------------------------------------------|--------------------------------------|--------------|-----------------|-----------------------------------------------------------------------------------------------------------------|
| <i>Methanospirillum hungatei</i> JF-1<br><a href="https://www.ncbi.nlm.nih.gov/nucleotide/NC_007796.1">https://www.ncbi.nlm.nih.gov/nucleotide/NC_007796.1</a>     | CCACGK                                       | CCACGK                               |              | REBASE & PacBio |                                                                                                                 |
|                                                                                                                                                                    | GATC                                         | GATC                                 | GATC         | REBASE & PacBio |                                                                                                                 |
|                                                                                                                                                                    | GCYYGAT                                      | GCCTGAT, GCCCGAT, BGCTCGAT, BGCTTGAC |              | REBASE & PacBio | here, AGCT was extracted first so BGCTCGAT, BGCTTGAC appeared instead of GCTCGAT and GCTTGAC                    |
|                                                                                                                                                                    | GTAC                                         | GTAC                                 |              | REBASE & PacBio |                                                                                                                 |
| <i>Clostridium perfringens</i> ATCC 13124<br><a href="https://www.ncbi.nlm.nih.gov/nucleotide/NC_008261.1">https://www.ncbi.nlm.nih.gov/nucleotide/NC_008261.1</a> | CCGG                                         | CCGG                                 |              | REBASE & PacBio |                                                                                                                 |
|                                                                                                                                                                    | CACNNNNNRATAAA                               | CACNNNNNATAAA*                       |              | REBASE & PacBio | *we manually checked the motif correctness here and did not find CACNNNNNGTAAA variants among modified contexts |
|                                                                                                                                                                    | GATC                                         | GATC                                 | GATC         | REBASE & PacBio |                                                                                                                 |
|                                                                                                                                                                    | GGWCC                                        | GGWCC                                |              | REBASE & PacBio |                                                                                                                 |
|                                                                                                                                                                    | GTATAC                                       | GTATAC                               |              | REBASE & PacBio |                                                                                                                 |
|                                                                                                                                                                    | VGACAT                                       | VGACAT                               |              | REBASE & PacBio |                                                                                                                 |
|                                                                                                                                                                    | WGGCCW                                       | WGGCCW                               |              | this study      | this motif was detected independently with both Snapper and Nanodisco                                           |

## 6. TGGCCA and CCAG motifs in *Thermacetogenium phaeum* DSM 12270 (Nanodisco motif refinement)

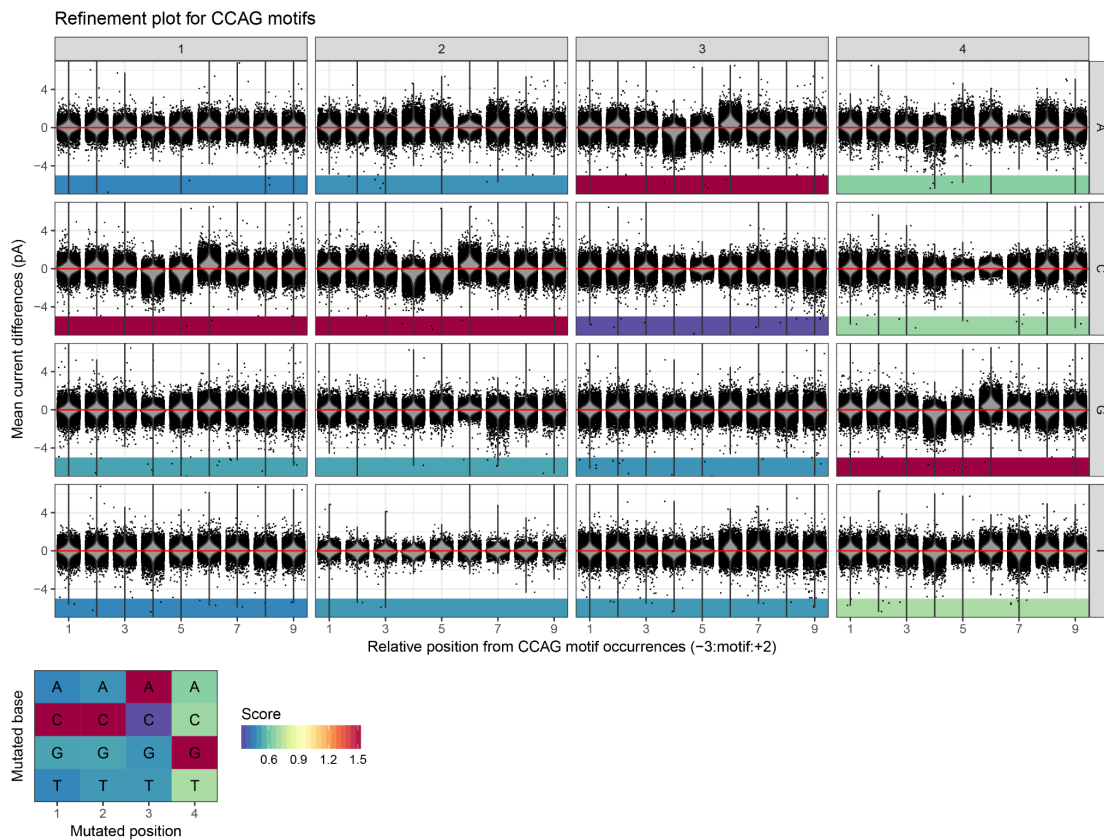

**Supplementary Figure 3.** Nanodisco refinement plot for CCAG motif detected in *Thermacetogenium phaeum* DSM 12270

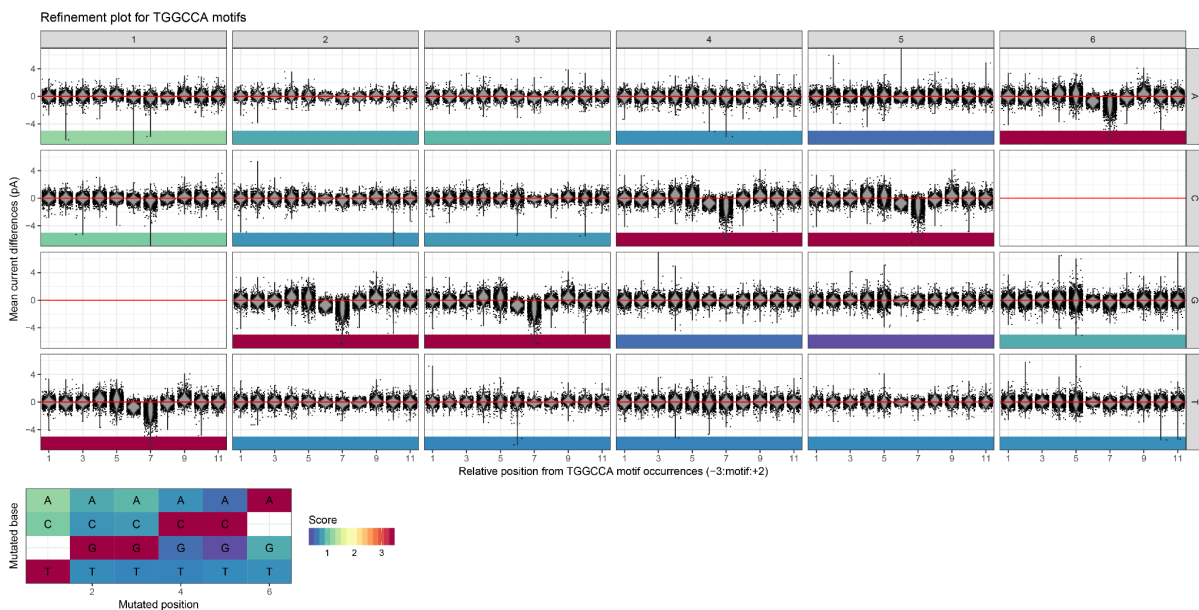

**Supplementary Figure 4.** Nanodisco refinement plot for TGGCCA motif detected in *Thermacetogenium phaeum* DSM 12270.

## 7. A45 extracted motifs

**Supplementary Table 6.** Snapper output for *H. pylori* A45.

| MOTIF   | conflevel | effsize | comment                                 |
|---------|-----------|---------|-----------------------------------------|
| NCATGN  | 32951.2   | 1.59    |                                         |
| NGCGCN  | 32109.6   | 1.11    |                                         |
| NTGCAN  | 19535.3   | 1.00    |                                         |
| NGAACN  | 21296.2   | 0.79    |                                         |
| NGGCCN  | 22838.8   | 1.42    |                                         |
| NGATCN  | 24323.8   | 0.46    |                                         |
| NCCAGN  | 22631.8   | 0.72    |                                         |
| NCCATCN | 29952.0   | 1.54    |                                         |
| NGAHTCN | 25034.2   | 0.72    | should be merged with NGANTC to NGANTCN |
| NGGGGAN | 14548.9   | 0.58    | GGAGA and GGGGA form GGRGA              |
| ATTAATN | 16256.6   | 1.26    |                                         |
| TCNNGAN | 16322.6   | 0.63    |                                         |
| NTCNGAN | 18074.7   | 0.63    |                                         |
| NGANTC  | 11994.4   | 0.37    |                                         |
| NGGAGAN | 11128.4   | 0.60    | GGAGA and GGGGA form GGRGA              |
| GTNNACN | 9591.0    | 0.92    |                                         |
| NTCGAN  | 4558.2    | 0.62    |                                         |

confidence level legend:

red  $\leq 500$

500 < yellow  $\leq 3000$

3000 < green

effect size legend:

red  $\leq 0.25$

0.25 < yellow  $\leq 0.5$

0.5 < green



## 8. *hpy* mutant analysis

**Supplementary Table 7.** Snapper output for *H. pylori* J99-*hpy* mutant.

| MOTIF   | confllevel | effsize | comment |
|---------|------------|---------|---------|
| NCATGN  | 70292.8    | 1.54    |         |
| NCCAANK | 68588.4    | 0.52    |         |

## 9. *hp1352* mutant analysis

**Supplementary Table 8.** Snapper output for *H. pylori* J99-*hp1352* mutant.

| MOTIF   | confllevel | effsize | comment |
|---------|------------|---------|---------|
| NGANTCN | 99349.1    | 0.66    |         |

## 10. *hp91/92* mutant analysis

**Supplementary Table 9.** Snapper output for *H. pylori* J99-*hp91/92* mutant.

| MOTIF   | confllevel | effsize | comment              |
|---------|------------|---------|----------------------|
| NGATCN  | 68280.2    | 0.69    |                      |
| NCCAATN | 63263.7    | 1.17    | submotif for NCCAANK |
| NCCAAGN | 83480.3    | 0.53    | submotif for NCCAANK |

## 11. *hp944* mutant analysis

**Supplementary Table 10.** Snapper output for *H. pylori* J99-*bc13* mutant.

| MOTIF  | confllevel | effsize | comment |
|--------|------------|---------|---------|
| NCCAGN | 83270.4    | 0.70    |         |

## 12. Signal distribution shifts in deactivated methylation sites in four A45 mutants.

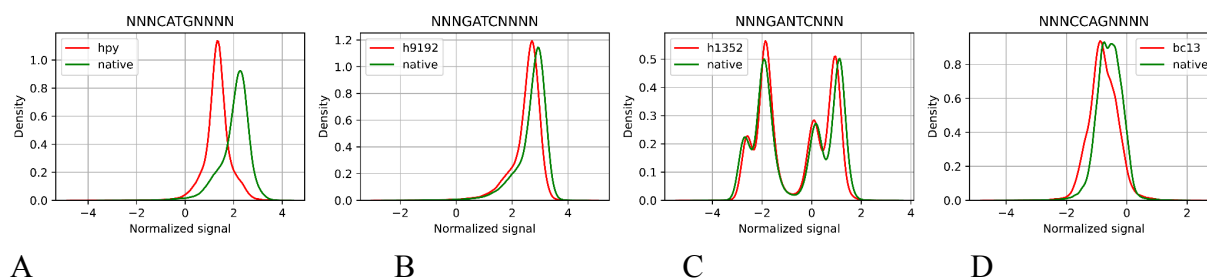

**Supplementary Figure 5.** Signal shifts for inactivated methylation sites in *hpy* (A), *hp91/92* (B), *hp1352* (C) and *hp944* (D) mutants. Here, the green plots represent the motif signal

distribution in the native DNA sample, red plots - the signal distribution in the corresponding mutant.

### 13. The list of proteins significantly overrepresented in *hpy* and *hp91/92* strains compared with the wild type and the *hp1352* mutant

Non-target proteomic analysis was carried out for wild A45, *hpy*, *hp1352* and *hp91/92*. For each sample, three biological repeats were analyzed, each in 3 technical repeats. In this study the proteomics data were used for identification of a new MTase that turned out to be active only in *hpy* and *hp91/92* mutants but not in the wild type, so, we were interested in the proteins that were significantly overrepresented in *hpy* and *hp91/92* mutants.

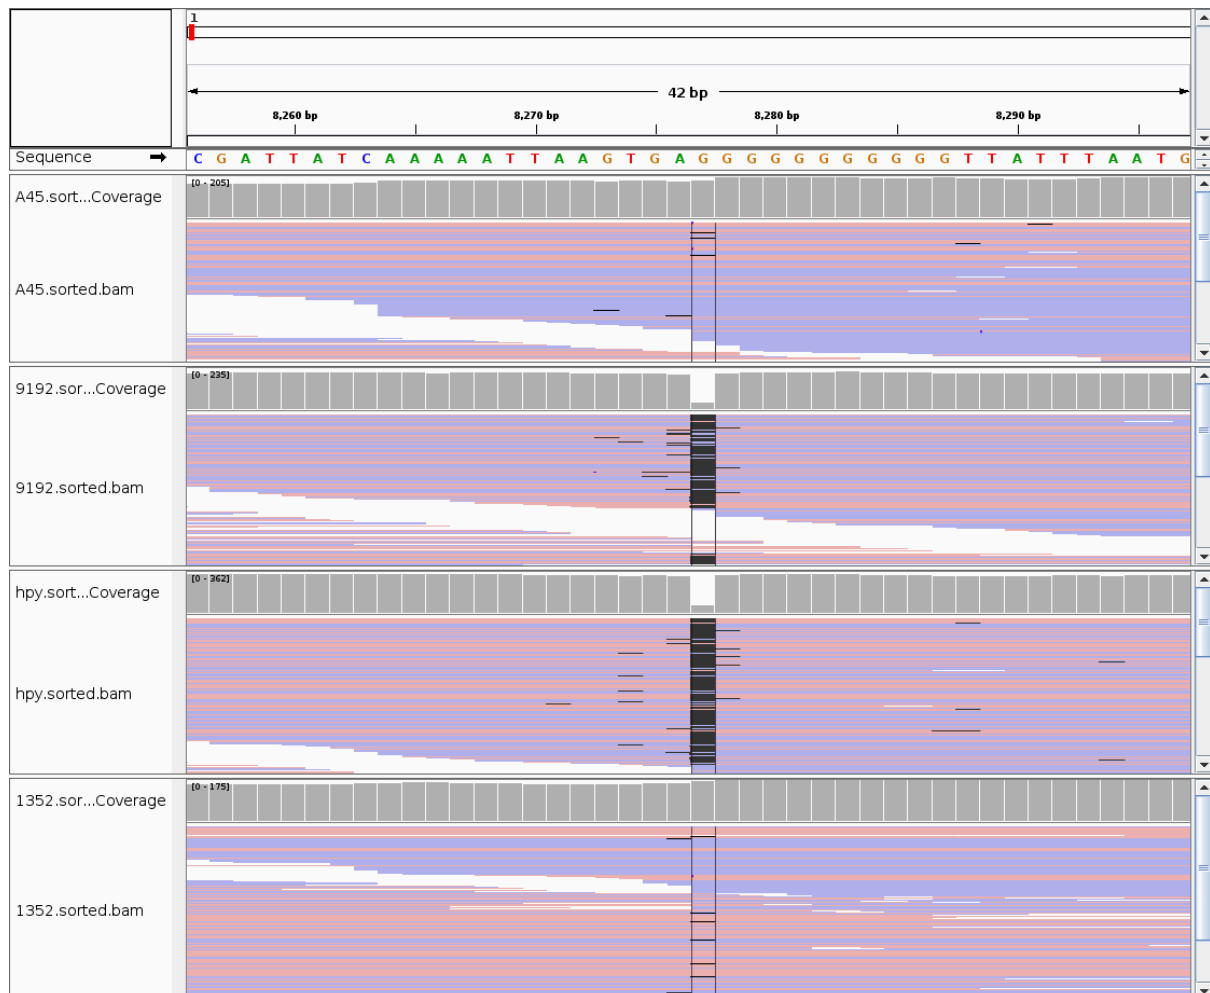

**Supplementary Figure 6.** Mapping Illumina reads to the reference genome sequence wild strain *H. pylori* A45. IGV snapshots with squished coverage mode, pink and blue segments were aligned to the forward and reverse strand, respectively. A black line represents a deletion with the event size.

## 14. Proteomics methods

### *LC-MS analysis*

Liquid chromatographic separation was performed on a reverse phase column (15 cm × 75 μm i.d., Agilent Technologies, USA) packed with Zorbax 300SB-C18 resin (particle size – 3 μm, pore diameter – 100 Å) that was coupled to a Q-Exactive HF hybrid quadrupole-Orbitrap mass spectrometer (Thermo Fisher Scientific, Germany) via a nanoelectrospray source Nanospray Flex (Thermo Fisher Scientific, Germany). Source voltage was set at 2200 V and capillary temperature at 325°C.

Each sample was introduced through EASY-nLC (Thermo, USA) chromatography system in trap-elute configuration (trap column was a 2 cm × 75 μm i.d. Acclaim PepMap column by Dionex, USA, with C18 resin with 3 μm-particles with 100 Å pores). Samples were introduced onto trap-column with 10 μL of solvent A (0.1% v/v formic acid) at constant pressure 500 bar. Peptides were eluted with a gradient of 5 to 50 % (v/v) of solvent B (0.1 v/v formic acid, 79.9 v/v acetonitrile) across 60 minutes at flowrate of 500 nl/min in 3 linear steps (10 minutes to 10% B, 25 min to 20% B, 15 min to 35% B, 10 min to 50% B). After each elution system and columns were washed with 100% of solvent B for 10 minutes and regenerated with 5% of solvent B for 20 minutes.

The mass-spectrometer was operated in positive mode in a data-dependent experiment with survey scans acquired at a resolution of 120,000 at m/z 400 within m/z range of 200-1600 with automatic gain control set for 3x10<sup>6</sup> and maximum injection time of 32 ms. As many as 20 of the most abundant precursor ions with a charge +2 and above from the survey scan were selected for HCD fragmentation. The normalized collision energy was 27. MS2 spectra were acquired at resolution of 7500 at m/z 400, automatic gain control was set for 2x10<sup>5</sup> and maximum injection time for 32 ms. After fragmentation ions were dynamically excluded from consideration for 45 s.

### *Quantification*

Proteins were relatively quantified using the MaxQuant software version 1.6.10.43. Raw files were searched with an integrated Andromeda search engine against the core peptide database. that consisted of peptides that could be produced by strictly one protein. Trypsin/P was specified as the cleavage enzyme, and two missed cleavages were permissible, minimum peptide length was 7. The FDR was set to 0.01 for peptide spectral matches.

Protein abundance was estimated as a total intensity of its 3 most intense peptides. Difference in each protein's abundance was considered significant if it allowed the FDR to be below 0.05, in addition.

**Supplementary Table 11.** The list of proteins significantly overrepresented in *hpy* and *hp91/92*.

| run ID                    | Protein IDs |            |             |            |            | strain     |
|---------------------------|-------------|------------|-------------|------------|------------|------------|
|                           | hp_0008     | hp_0009    | hp_0010     | hp_0927    | hp_0928    |            |
| LFQ intensity<br>AO0102_1 | 9810800000  | 7322500000 | 10202000000 | 1190400000 | 1529000000 | <i>hpy</i> |

|                           |             |            |             |            |            |                |
|---------------------------|-------------|------------|-------------|------------|------------|----------------|
| LFQ intensity<br>AO0102_2 | 9364100000  | 7110000000 | 10412000000 | 1596300000 | 1380800000 | <i>hpy</i>     |
| LFQ intensity<br>AO0102_3 | 9217600000  | 6737600000 | 10113000000 | 1658200000 | 1688300000 | <i>hpy</i>     |
| LFQ intensity<br>AO0103_1 | 9362900000  | 6948900000 | 9295500000  | 1165200000 | 970480000  | <i>hpy</i>     |
| LFQ intensity<br>AO0103_2 | 9665300000  | 6658300000 | 9460100000  | 1132600000 | 998490000  | <i>hpy</i>     |
| LFQ intensity<br>AO0103_3 | 8736100000  | 6376000000 | 9482000000  | 1128500000 | 1245900000 | <i>hpy</i>     |
| LFQ intensity<br>AO0104_1 | 9360800000  | 6591000000 | 10903000000 | 1131000000 | 1323500000 | <i>hpy</i>     |
| LFQ intensity<br>AO0104_2 | 8843400000  | 7027400000 | 10689000000 | 1018700000 | 1583300000 | <i>hpy</i>     |
| LFQ intensity<br>AO0104_3 | 9332200000  | 6635600000 | 10548000000 | 1356200000 | 1537700000 | <i>hpy</i>     |
| LFQ intensity<br>AO0111_1 | 5706700000  | 4080700000 | 6088600000  | 375560000  | 669250000  | <i>hp91/92</i> |
| LFQ intensity<br>AO0111_2 | 5856900000  | 4130300000 | 5813000000  | 475570000  | 348050000  | <i>hp91/92</i> |
| LFQ intensity<br>AO0111_3 | 5860100000  | 3564400000 | 6109200000  | 538440000  | 717000000  | <i>hp91/92</i> |
| LFQ intensity<br>AO0112_1 | 10047000000 | 5009000000 | 7978300000  | 645450000  | 494010000  | <i>hp91/92</i> |
| LFQ intensity<br>AO0112_2 | 5687900000  | 5605000000 | 7879400000  | 425440000  | 353280000  | <i>hp91/92</i> |
| LFQ intensity<br>AO0112_3 | 6209200000  | 3999900000 | 7302800000  | 416250000  | 248620000  | <i>hp91/92</i> |
| LFQ intensity<br>AO0113_1 | 6562300000  | 5895700000 | 7702500000  | 201770000  | 158900000  | <i>hp91/92</i> |
| LFQ intensity<br>AO0117_1 | 0           | 0          | 0           | 0          | 0          | A45            |
| LFQ intensity<br>AO0117_2 | 0           | 0          | 0           | 0          | 0          | A45            |
| LFQ intensity<br>AO0117_3 | 0           | 0          | 0           | 0          | 0          | A45            |
| LFQ intensity<br>AO0118_1 | 0           | 0          | 0           | 0          | 0          | A45            |
| LFQ intensity<br>AO0118_2 | 0           | 0          | 0           | 0          | 0          | A45            |
| LFQ intensity<br>AO0118_3 | 0           | 0          | 0           | 0          | 0          | A45            |
| LFQ intensity             | 0           | 0          | 0           | 0          | 0          | A45            |

|                           |            |   |   |   |   |               |
|---------------------------|------------|---|---|---|---|---------------|
| AO0119_1                  |            |   |   |   |   |               |
| LFQ intensity<br>AO0119_2 | 1145400000 | 0 | 0 | 0 | 0 | A45           |
| LFQ intensity<br>AO0119_3 | 0          | 0 | 0 | 0 | 0 | A45           |
| LFQ intensity<br>AO0123_1 | 0          | 0 | 0 | 0 | 0 | <i>hp1352</i> |
| LFQ intensity<br>AO0123_2 | 0          | 0 | 0 | 0 | 0 | <i>hp1352</i> |
| LFQ intensity<br>AO0124_1 | 0          | 0 | 0 | 0 | 0 | <i>hp1352</i> |
| LFQ intensity<br>AO0125_1 | 0          | 0 | 0 | 0 | 0 | <i>hp1352</i> |
| LFQ intensity<br>AO0125_2 | 0          | 0 | 0 | 0 | 0 | <i>hp1352</i> |
| LFQ intensity<br>AO0125_3 | 0          | 0 | 0 | 0 | 0 | <i>hp1352</i> |

**Supplementary Table 12.** BLAST annotation of the proteins overrepresented in *hpy* and *hp9192* mutants.

| gene          | protein sequence                                                                                                                                                                                                                                                                                                                                                                                                                                                                                                     | annotation                                                  |
|---------------|----------------------------------------------------------------------------------------------------------------------------------------------------------------------------------------------------------------------------------------------------------------------------------------------------------------------------------------------------------------------------------------------------------------------------------------------------------------------------------------------------------------------|-------------------------------------------------------------|
| <i>hp0008</i> | MQNKEIGEEKSVKEKNLEVFNRYFPGCLSIENDDKLTLDTG<br>RLKALLGDFSEIKEEGYGLDFVGGKIALNQAFKKNKILKP<br>LNESTSKHILIKGDNLDALKILKQSYSEKIKMIYIDPPYNTK<br>NDNFIYSDDFSQSNEETLKQLDYSKEKLDYIKNLFGSKCHS<br>GWLSEFMYPRLLLAKDLLKQDGVIFISIDDNECAQLKLLCDE<br>IFGEGNFVAEMPRLTKKAGKSTNQIAKNHDYVLCYQKNNI<br>NFKQIDIDENDYPLKDEFYNERGGYKLNQNLDYNSLQYNK<br>KMDYEIVISNEKFYAGGLETYTERQKGNFGTIDWVWRWSK<br>AKFDFGLANGFVEVKNNRIYTKTYTKAKISDSKPYKIEYFN<br>RTKNISSIEFLDNKYSNDMSNKKLQSIFNVKNIFDYSKPVEL<br>ISFLIDQTTEKGDIIIDFFAGSGTTAHAVLESNKSDYQKLSEG<br>GGVI | site-specific DNA<br>methyltransferase (broken)             |
| <i>hp0009</i> | MRGGGLFNGLNAAFKERRFILVQLDEKIDPKKNKSAYDFC<br>LNTLKSPSPSIFDITEERIKRAGAKIKEACPHLDVGFRAFEIID<br>DETHANDKNLSQAHQKDLFAYSNPKKRETQTILIKLLGCEG<br>LELTPINCLIENALYLALNTAFIVGDIEMSEVLENLKDKGV<br>EKISVYMPAISNDRLCLELGSNLLDLKLESGDLKIRG                                                                                                                                                                                                                                                                                          | site-specific DNA<br>methyltransferase (broken)             |
| <i>hp0010</i> | MKIKFKRLDYQEQRDQILGVFKGIYLRPENDAQRISNPV<br>FEIGEIKDLLLENIENLRSKQKITQGSVGDKSLNCDILMETG<br>TGKTFCFLECVYSLHKNYHLSKFIVLVPSNAIKLGVLSVEI<br>TREFFKSEYSTHLESYEDIRSFILASNHKCCVLMTFSAFNK<br>EKNTINKSCLNTNLFNGAKSYMQALASISPVVIMDEPHRF<br>LGDKTKKYLEQLNALITLRFGATFKDDYKNLIYALDSKKAF                                                                                                                                                                                                                                             | type III<br>restriction-modification<br>system endonuclease |

|               |                                                                                                                                                                                                                                                                                                                                                                                                                                                                                                                                                                                                                                                                                                                                                                                                                                                                                                                                                                                                                                                                                                                                                                   |                                                 |
|---------------|-------------------------------------------------------------------------------------------------------------------------------------------------------------------------------------------------------------------------------------------------------------------------------------------------------------------------------------------------------------------------------------------------------------------------------------------------------------------------------------------------------------------------------------------------------------------------------------------------------------------------------------------------------------------------------------------------------------------------------------------------------------------------------------------------------------------------------------------------------------------------------------------------------------------------------------------------------------------------------------------------------------------------------------------------------------------------------------------------------------------------------------------------------------------|-------------------------------------------------|
|               | <p>DCALVKSISVASVGESNECFLELKGVVKIQNGYEAMINYTN<br/> LENKIQSVKVKKHDNLGALTQISALEDYIVENITKTEARFLN<br/> GFNLLLDQKEPFSHLLERGEQEVMLKEAIKSHFEREEGLFKK<br/> GIKALCMVFISGVNSYLSENEKPAKLALLFEKLYQQKLEEV<br/> LKKEDLDENYRAYLERTKDNIQKVHGGYFAKSKKESDEAQ<br/> VIALILKEKEKLLSFESDLRFIFSQWALQEGWDNPNVMTICK<br/> LAPSHSHITKLQQIGRGLRLAVNDKGERITKEHADDFVNE<br/> LVVIVPQVEGDFVGAIQQEISEHSLIKQVFSGEELEKSGIVK<br/> KGYYGALLEKLES LGFGEKTDDENFKLTLNQNEFLEKEPEL<br/> EKLKDEKYL NLEKLGFLKDR LIGNSRVRNKNERKSEKIKI<br/> NKENFKKFETLWEGLNHQARIAY AIDSESLIDEIVKNIDSSF<br/> NVKSKIVSVTTHKKVETMGNNAKTEIFEQKSACVWSLHEFI<br/> SALSNKVKLSFKSVAKVLENIDENKFDLIKNEQESLRRLE<br/> ELFLEIYQNIRDRISYQMRETTIKDRKND AFYDEKGEIREFL<br/> DGSVLGDKYEIKNSSTQEKC LYENFMQVESEIEKDTIEESND<br/> TKIIVFGKLPRVKIPIGLNQTYSPDFGYVVENNDKKVLLVVE<br/> TKGVENESELHEEEKRKISTAKKFFEALKKQGVNIEYKTKI<br/> KKDQLSALINEVLNRKD</p>                                                                                                                                                                                                                                                                                                 |                                                 |
| <i>hp0927</i> | <p>MILLEQIAHSSGFEEKFIVKTLGIQNVENFINN WYGKQSLSSF<br/> ANNFVPGGLNQALDKIGSSTDAKDLQSFLDKTTFGDILNQ<br/> MINQAPLINKLISWLG PQDLSVLVNIALNSITNPSKELTSTISS<br/> IGEKALNDLLGEGV VNKIMSNQVLGQMINKIIADKGF GG V<br/> YHQGLGSILPKSLQKELEQFGLG SLLGSRGLHNLWQKGNF<br/> NFLAKDYV FVNSSFSNATGGELNFVAGKSIIFNGKNTINFT<br/> QYQGKLSFISKDFSNISLDTLNATNGLILNAPRNDISVQKGQ<br/> ICVNVLNCMSEKKTNPSTSSAPTDETLVNANNFAFLGTIK<br/> ANGLVDFSKVLQNTTIGTLDL GANATFKANNLIVNNAFNN<br/> NSNYRVNISGNLNVVKGAALSTNENGLNVGGDFKSEGLIF<br/> NLNNPTHQTIINVTGASTIMS YNNQTLINLNTQLKQGSYTL<br/> MDAKRMLYGYDNQIIRQGSLS DYLKLYTLIDFNGKRMQLN<br/> GDSLSYDNQPVNIKDGGLVVSFKDNQGMVYSSILYDKVQ<br/> VSVSDKPMDIHAPSLEYIYIQR IQGSGGLNAIKSAGNNSIMW<br/> LNELFVAKGGNPLFAPYYLQDN PTEHIVTLMKDITSALGML<br/> SNSNLKNNSTDALQLNTYTQ QMSRLAKLSNFASFDSTDFSE<br/> RLSSLKNQRFADAIPNAMDMVILKYSQRDKLKNNLWATGVG<br/> GVSVFVNGTGTLYGVNVGYDRFIKGVIVGGYAAAYGYS GFY<br/> ERITNSKSDNVDVGLYARAFIKK SELTFSVNETWGANKTQI<br/> NSNDTLLSMINQSYKYSTWTTNAKVNYGYDFMFKNKS IIL<br/> KPQIGLRYYYIGMTGLEGMNNA LYNQFKANADPSKKS SVL<br/> TIDLALENRHYFNTNSYFYAIGGVGRDLLVRSMDKLVRFI<br/> GDNTLSYRKGELYNTFASIT TGGEVRLFKSFYANAGVGARF<br/> GLDYKMINITGNIGMRLAF</p> | vacuolating cytotoxin domain-containing protein |
| <i>hp0928</i> | <p>MTYRNSKIDLKNERFSKNRSFKGVKKKIAKHKAKNLSLI<br/> AHAFKTQSNLSASFNKKIFLGLGFVSALSAEDYKSSVYWL<br/> NSVNENNSHKSYYSPLRTWAGGSR SFTQNYNNSQLYIGT<br/> KNASATPNNSSIWFG EKGYVGFITGVFKAKDIFITGAVGSG<br/> NEWKTGGGAILVFESSNELNANGAYFQNNRAGTQT SWINLI<br/> SNNSVNLNTDFGNQTPNGGF NAMGRKITYNGGIVNGGNF<br/> GFDNVDSNGTTTISGVTFN NNGALTYKGGNGIGGSITFTNS<br/> NINHYKLNLNANSVTFN NSTLGSM PNGNANTIGNAYILNA<br/> NNITFNNLTFNGGWFVFNRP DANVNFQGT TTTINNPTSPFVN<br/> MTGKVTINPNAIFNIQNYTP SIGSAYTLFSMKNGNITYNNVN</p>                                                                                                                                                                                                                                                                                                                                                                                                                                                                                                                                                                                                                                                                       | vacuolating cytotoxin domain-containing protein |

NLWNIIRLKNTQATKDENSENATSNNNHTHTYYVTYNLGGTL  
YHFRQIFSPDSIVLQSVYYYGANNIYYTNSVNIHDNVFNLKNI  
NDDRADTIFYLNGLNTWNYTNARFTQTYGGKNSALVFNAT  
TPWANGAIPKSNSTVRFGGYEGVNWGKTGYITGTFTADRV  
YITGNMMSGNGAQTGGGATLNFVGGATEINIAGADFKNLKT  
TSQNSYMTFIALGDSSSGSKINVSQSDFYDWTGGGYDFTG  
NSTFDSVNFNKAYYKFQGAENSYTFKNTNFLAGNFKFQGK  
TTIEKSVLDDASYSFDGINNAFNEKDFNGGSFNFNKQVNF  
SGNSFNNGGVFNFNTPKVSFTDDTFNVNNQFKINGAQTFT  
FNKGVIFNMQGLLSSLSVGTTYQLLNAKSVDYKDNNNALY  
QMLHWISGENPSGKLVNENKTAPSSAKIYNVHFTDNGLTY  
YIKENFNNGITLRLCTLGYTHCVNIHNEVFHLKNINNNAS  
NTVFYLNMGMTTWKIAGTGVFTQDYSGANSVLVFNQTTPL  
AGANPTSNSVVSFGKTSGAEWGLVGYIQGVFKANQIDITGT  
IRSGNGAQTGGGATLVFNAEKRLNIAHAHLNNDKAGLQDS  
WMNFIVNNGNLNATNANFSNQTPHGGFNKANDITFNNGS  
VSGGGNFGVDNANANGNAVIKNVNFSDNGTLIYKGGENS  
AGNSLTLENNTFN SYNINARVQNLIFNNNSFNNGGSYSFNDT  
KNTTFKGTNTLNSDPFSRLQGSIAIDNNSIFNIERDLTDNTT  
YTLLSGNNIKYNNEILADNAFSLNLWNLIHYGGEQGTLLRA  
DNNTFFVQFTQSNQKQFVFEETFNSSSITYKYFTIHSSLFHT  
DNDSKDIWSQVRKQDFIPGKTPVCVGVCIAPYKNQDLIG  
SSAFAWSLNFVTVVGTLLLGSAQEKANDNGGSIWFGKNN  
LLYLHGNFNATNIFLTNNFNVGNPNAGGGATISFNADETL  
ADGLNYTNFQTVAMGLQTSTSQHSWANFNSRLSMEIKNSN  
FRDFTWGGFNFNNGRIAFENTTFSGWTNINGATESGSSYVN  
MVANTDLIFTDSILGGGIRYDLKANNIIFNNSQIVIDVSKNV  
NQSSLNGNVTFNHSRLSVKPNAAINIGDSQTQTLENASSL  
SFYNNSVANFNNGTTAFNGVSYLNLNPNAQVSFNQANFNNA  
NVTFYGIPLFGKTPDFGNSARLINFKGNTNFNQATLNLRAK  
NIHINFQGASTFENNSTMNLAESSQASFNALSVEGETNFNL  
NNSLLNFNGNSVFNAPVSFYANNSQISFTKLATFNADASF  
DLSNNSTLNFQSVLLNGTLNLLGNGANALAINASGNFSFGT  
QGVNLNSVNLFDKKNKPLVYNILQAQNIQGLMGNNGYE  
KIRFYGIQIDKADYSFNNGVHSWSFTNPLNTTETITETLHNN  
RLKVQISQNGVSNNEFMNLAPSLYFYQKNPYNESSNSYNY  
TSDKAGTYYLSSNIKSFNQNNKTPGTYNVQNQPLQALHIY  
NQAITKQDLNMIASLGKEFLPKIANLLSSGALDNLNLNSPN  
GFETLFGIFEKYGITLNQENWKSLLKIINNFNTANYDFSQ  
NLVVGAIKEGQTNTNSVWVWFGGEGYKEPCAVGDNTCQMF  
RQTNLGQLLSSAPYLYGINANFKAKNIYITGTIGSGNAWG  
SGGSANVSFESGTNLVLNQNANIDAQGTDKIFSILGQGGIEK  
LFGKGLGNALSNIIEESLNDNAIPKDLANMIPKDLGSKTL  
SSLLSPTEVNLLGVSAFKNAIMEILNSKTVGDVFGENGLL  
NALIL
